# Supplementary material for: Elastic-Plastic Thermal Stress Analysis of a High-Pressure Cryogenic Storage Tank
Source: MDPI journal article supplement (doi:10.3390/nu14132704), 2003-08-15
Supplement: s1 [file s1]

# Impacts of COVID-19 on Nutritional Intake in Rural China: Panel Data Evidence

Xinru Han <sup>1,†</sup>, Yufei Guo <sup>2,3,†</sup>, Ping Xue <sup>1</sup>, Xiudong Wang <sup>1</sup> and Wenbo Zhu <sup>4,\*</sup>

**Table S1.** Estimation results of the COVID-19 impact on dietary energy intake by income groups.

| Variables             | Low Income            | Middle-Low Income   | Middle-High Income  | High Income          |
|-----------------------|-----------------------|---------------------|---------------------|----------------------|
| <i>Covid</i>          | −0.0258**<br>(0.0106) | −0.0110<br>(0.0093) | −0.0011<br>(0.0069) | −0.0096*<br>(0.0054) |
| <i>lnPrice_energy</i> | −0.47***<br>(0.07)    | −0.50***<br>(0.11)  | −0.35***<br>(0.10)  | −0.39***<br>(0.11)   |
| <i>lnExp</i>          | −0.33<br>(1.81)       | 2.67*<br>(1.56)     | 2.97<br>(2.01)      | 1.33<br>(1.85)       |
| <i>lnExpsq</i>        | 0.02<br>(0.09)        | −0.12<br>(0.08)     | −0.13<br>(0.10)     | −0.05<br>(0.09)      |
| <i>Family_size</i>    | −0.10***<br>(0.03)    | −0.11***<br>(0.03)  | −0.06<br>(0.06)     | −0.04<br>(0.03)      |
| <i>Aworkday</i>       | −0.00<br>(0.00)       | −0.00<br>(0.00)     | 0.00<br>(0.00)      | 0.00<br>(0.00)       |
| <i>Heavywork</i>      | 0.03<br>(0.05)        | 0.04<br>(0.04)      | 0.06<br>(0.04)      | 0.00<br>(0.03)       |
| <i>Sport</i>          | 0.05<br>(0.03)        | 0.00<br>(0.06)      | 0.02<br>(0.03)      | 0.03<br>(0.03)       |
| <i>lnRetail</i>       | 0.03<br>(0.08)        | 0.08<br>(0.06)      | 0.30***<br>(0.11)   | 0.00<br>(0.07)       |
| <i>Internet</i>       | −0.00<br>(0.03)       | −0.09<br>(0.05)     | −0.06<br>(0.05)     | 0.02<br>(0.03)       |
| Constant              | 8.07<br>(9.54)        | −7.70<br>(7.98)     | −10.57<br>(9.99)    | −0.87<br>(9.53)      |
| Observations          | 976                   | 910                 | 912                 | 1,036                |
| R-squared             | 0.97                  | 0.98                | 0.96                | 0.97                 |
| Year FE               | YES                   | YES                 | YES                 | YES                  |
| Household FE          | YES                   | YES                 | YES                 | YES                  |
| County FE             | YES                   | YES                 | YES                 | YES                  |
| Province FE           | YES                   | YES                 | YES                 | YES                  |
| Cluster               | Village               | Village             | Village             | Village              |

Notes: Standard errors in parentheses; \*  $p < 0.10$ , \*\*  $p < 0.05$ , \*\*\*  $p < 0.01$ .

**Table S2.** Estimation results of the COVID-19 impact on carbohydrate intake by income groups.

| Variables          | Low Income            | Middle-Low Income   | Middle-High Income  | High Income          |
|--------------------|-----------------------|---------------------|---------------------|----------------------|
| <i>Covid</i>       | -0.0218**<br>(0.0106) | -0.0092<br>(0.0097) | -0.0009<br>(0.0067) | -0.0108*<br>(0.0056) |
| <i>lnPrice_ch</i>  | -0.82***<br>(0.10)    | -0.92***<br>(0.08)  | -0.63***<br>(0.13)  | -0.92***<br>(0.11)   |
| <i>lnPrice_fat</i> | 0.23***<br>(0.09)     | 0.13<br>(0.18)      | 0.53***<br>(0.13)   | 0.26**<br>(0.13)     |
| <i>lnPrice_pt</i>  | 0.23*<br>(0.12)       | 0.25<br>(0.21)      | -0.17<br>(0.21)     | 0.33<br>(0.23)       |
| <i>lnExp</i>       | -0.36<br>(1.77)       | 3.00*<br>(1.63)     | 2.48<br>(2.08)      | 1.46<br>(1.68)       |
| <i>lnExpsq</i>     | 0.03<br>(0.09)        | -0.13<br>(0.08)     | -0.11<br>(0.10)     | -0.06<br>(0.08)      |
| <i>Family_size</i> | -0.09***<br>(0.03)    | -0.11***<br>(0.04)  | -0.06<br>(0.06)     | -0.05<br>(0.04)      |
| <i>Aworkday</i>    | -0.00<br>(0.00)       | -0.00<br>(0.00)     | 0.00<br>(0.00)      | 0.00<br>(0.00)       |
| <i>Heavywork</i>   | 0.03<br>(0.04)        | 0.05<br>(0.04)      | 0.07**<br>(0.03)    | -0.01<br>(0.03)      |
| <i>Sport</i>       | 0.05<br>(0.04)        | 0.01<br>(0.05)      | 0.02<br>(0.04)      | 0.03<br>(0.03)       |
| <i>lnRetail</i>    | -0.02<br>(0.08)       | 0.02<br>(0.07)      | 0.27**<br>(0.12)    | -0.01<br>(0.07)      |
| <i>Internet</i>    | -0.01<br>(0.03)       | -0.10<br>(0.06)     | -0.06<br>(0.06)     | 0.01<br>(0.03)       |
| Constant           | 6.43<br>(9.17)        | -11.13<br>(8.32)    | -10.02<br>(10.41)   | -3.91<br>(8.90)      |
| Observations       | 976                   | 910                 | 912                 | 1,036                |
| R-squared          | 0.99                  | 0.99                | 0.99                | 0.99                 |
| Year FE            | YES                   | YES                 | YES                 | YES                  |
| Household FE       | YES                   | YES                 | YES                 | YES                  |
| County FE          | YES                   | YES                 | YES                 | YES                  |
| Province FE        | YES                   | YES                 | YES                 | YES                  |
| Cluster            | Village               | Village             | Village             | Village              |

Notes: Standard errors in parentheses; \*  $p < 0.10$ , \*\*  $p < 0.05$ , \*\*\*  $p < 0.01$ .

**Table S3.** Estimation results of the COVID-19 impact on fat intake by income groups.

| <b>Variables</b>   | <b>Low Income</b>     | <b>Middle-Low Income</b> | <b>Middle-High Income</b> | <b>High Income</b>    |
|--------------------|-----------------------|--------------------------|---------------------------|-----------------------|
| <i>Covid</i>       | -0.0292**<br>(0.0122) | -0.0118<br>(0.0107)      | -0.0007<br>(0.0069)       | -0.0124**<br>(0.0052) |
| <i>lnPrice_ch</i>  | 0.15<br>(0.09)        | 0.06<br>(0.07)           | 0.26**<br>(0.13)          | 0.05<br>(0.11)        |
| <i>lnPrice_fat</i> | -0.86***<br>(0.08)    | -0.94***<br>(0.16)       | -0.57***<br>(0.12)        | -0.80***<br>(0.12)    |
| <i>lnPrice_pt</i>  | 0.25**<br>(0.11)      | 0.29<br>(0.20)           | -0.02<br>(0.20)           | 0.37<br>(0.24)        |
| <i>lnExp</i>       | -0.52<br>(1.77)       | 3.09*<br>(1.59)          | 2.45<br>(1.86)            | 1.03<br>(1.69)        |
| <i>lnExpsq</i>     | 0.03<br>(0.09)        | -0.14*<br>(0.08)         | -0.11<br>(0.09)           | -0.04<br>(0.08)       |
| <i>Family_size</i> | -0.09***<br>(0.03)    | -0.11***<br>(0.04)       | -0.07<br>(0.06)           | -0.04<br>(0.04)       |
| <i>Aworkday</i>    | -0.00<br>(0.00)       | -0.00<br>(0.00)          | 0.00<br>(0.00)            | 0.00<br>(0.00)        |
| <i>Heavywork</i>   | 0.02<br>(0.04)        | 0.04<br>(0.04)           | 0.07**<br>(0.03)          | -0.00<br>(0.03)       |
| <i>Sport</i>       | 0.05<br>(0.04)        | 0.01<br>(0.06)           | 0.02<br>(0.03)            | 0.02<br>(0.03)        |
| <i>lnRetail</i>    | -0.01<br>(0.09)       | 0.05<br>(0.07)           | 0.29***<br>(0.11)         | -0.01<br>(0.07)       |
| <i>Internet</i>    | -0.00<br>(0.03)       | -0.08<br>(0.06)          | -0.03<br>(0.05)           | 0.02<br>(0.03)        |
| Constant           | 7.62<br>(9.24)        | -11.42<br>(8.19)         | -9.75<br>(9.36)           | -1.43<br>(8.93)       |
| Observations       | 976                   | 910                      | 912                       | 1,036                 |
| R-squared          | 0.97                  | 0.98                     | 0.96                      | 0.98                  |
| Year FE            | YES                   | YES                      | YES                       | YES                   |
| Household FE       | YES                   | YES                      | YES                       | YES                   |
| County FE          | YES                   | YES                      | YES                       | YES                   |
| Province FE        | YES                   | YES                      | YES                       | YES                   |
| Cluster            | Village               | Village                  | Village                   | Village               |

Notes: Standard errors in parentheses; \*  $p < 0.10$ , \*\*  $p < 0.05$ , \*\*\*  $p < 0.01$ .

**Table S4.** Estimation results of the COVID-19 impact on protein intake by income groups.

| Variables          | Low Income            | Middle-Low Income   | Middle-High Income  | High Income         |
|--------------------|-----------------------|---------------------|---------------------|---------------------|
| <i>Covid</i>       | -0.0228**<br>(0.0115) | -0.0036<br>(0.0100) | -0.0044<br>(0.0076) | -0.0068<br>(0.0051) |
| <i>lnPrice_ch</i>  | 0.12<br>(0.10)        | 0.02<br>(0.07)      | 0.22<br>(0.14)      | 0.01<br>(0.11)      |
| <i>lnPrice_fat</i> | 0.20**<br>(0.09)      | 0.09<br>(0.16)      | 0.55***<br>(0.14)   | 0.29**<br>(0.11)    |
| <i>lnPrice_pt</i>  | -0.67***<br>(0.12)    | -0.57***<br>(0.19)  | -0.96***<br>(0.21)  | -0.59***<br>(0.21)  |
| <i>lnExp</i>       | -0.55<br>(1.79)       | 2.66<br>(1.63)      | 3.44<br>(2.14)      | 1.01<br>(1.69)      |
| <i>lnExpsq</i>     | 0.04<br>(0.09)        | -0.12<br>(0.08)     | -0.16<br>(0.11)     | -0.04<br>(0.08)     |
| <i>Family_size</i> | -0.10***<br>(0.03)    | -0.11***<br>(0.04)  | -0.09<br>(0.07)     | -0.04<br>(0.03)     |
| <i>Aworkday</i>    | -0.00<br>(0.00)       | -0.00<br>(0.00)     | 0.00<br>(0.00)      | 0.00<br>(0.00)      |
| <i>Heavywork</i>   | 0.01<br>(0.04)        | 0.04<br>(0.04)      | 0.07*<br>(0.03)     | -0.01<br>(0.04)     |
| <i>Sport</i>       | 0.04<br>(0.03)        | -0.02<br>(0.07)     | -0.02<br>(0.04)     | -0.01<br>(0.02)     |
| <i>lnRetail</i>    | -0.01<br>(0.08)       | 0.05<br>(0.07)      | 0.28**<br>(0.12)    | 0.01<br>(0.07)      |
| <i>Internet</i>    | -0.01<br>(0.03)       | -0.09<br>(0.06)     | -0.02<br>(0.05)     | 0.02<br>(0.03)      |
| Constant           | 7.18<br>(9.28)        | -9.42<br>(8.38)     | -14.90<br>(10.69)   | -1.48<br>(8.94)     |
| Observations       | 976                   | 910                 | 912                 | 1,036               |
| R-squared          | 0.98                  | 0.98                | 0.97                | 0.98                |
| Year FE            | YES                   | YES                 | YES                 | YES                 |
| Household FE       | YES                   | YES                 | YES                 | YES                 |
| County FE          | YES                   | YES                 | YES                 | YES                 |
| Province FE        | YES                   | YES                 | YES                 | YES                 |
| Cluster            | Village               | Village             | Village             | Village             |

Notes: Standard errors in parentheses; \*  $p < 0.10$ , \*\*  $p < 0.05$ , \*\*\*  $p < 0.01$ .
